# Supplementary material for: Pre- versus post-exercise protein intake has similar effects on muscular adaptations
Source: PeerJ. 2017 Jan 3;5:e2825. doi: 10.7717/peerj.2825 (PMC5214805; doi:10.7717/peerj.2825)
Supplement: File S1 [file peerj-05-2825-s001.xlsx]

## Sheet: Sheet1
ID#	CODE	Group	Age	Height	WeightT1	WeightT2	WeightT3	SYST1	SYST2	SYST3	DYST1	DYST2	DYST3	HRT1	HRT2	HRT3	CaloricREE	DEXA LeftArmFat Mass T1	DEXA LeftArmFat Mass T2	DEXA LeftArmFat Mass T3	DEXA LeftArmLean Mass T1	DEXA LeftArmLean Mass T2	DEXA LeftArmLean Mass T3	DEXA LeftArmTotal Mass T1	DEXA LeftArmTotal Mass T2	DEXA LeftArmTotal Mass T3	DEXA RightArm Fat Mass T1	DEXA RightArm Fat Mass T2	DEXA RightArm Fat Mass T3	DEXA RightArm Lean Mass T1	DEXA RightArm Lean Mass T2	DEXA RightArm Lean Mass T3	DEXA RightArm TotalMass T1	DEXA RightArm TotalMass T2	DEXA RightArm TotalMass T3	DEXA LeftLeg Fat Mass T1	DEXA LeftLeg Fat Mass T2	DEXA LeftLeg Fat Mass T3	DEXA LeftLeg Lean Mass T1	DEXA LeftLeg Lean Mass T2	DEXA LeftLeg Lean Mass T3	DEXA LeftLeg Total Mass T1	DEXA LeftLeg Total Mass T2	DEXA LeftLeg Total Mass T3	DEXA RightLeg Fat Mass T1	DEXA RightLeg Fat Mass T2	DEXA RightLeg Fat Mass T3	DEXA RightLeg Lean Mass T1	DEXA RightLeg Lean Mass T2
8	AM1	A	26	177.9	84.6	88.8	85.6	130	119	125	80	61	64	76	49	69	2169	733.9	687.3	698.2	3726	3513.8	3766.1	4659.5	4379.1	4660.4	694.1	773.3	624.1	3899	4223.1	4030.2	4803.4	5225	4875.9	3026.8	2753.2	2718.6	10805.6	11301.9	11173.2	14423.8	14668.1	14451.1	3074	3121.4	2854.4	11462.8	11910
27	KK2	A	20	183.3	93.4	90	90	138	139	128	69	65	70	61	63	70	2318.6	698.6	718.6	613.5	4287.1	4559	4265.1	5238.8	5554.4	5123.9	672.9	600.1	514.6	4418.4	4128.8	4575.7	5373.3	4987.5	5355.6	3170	2860.3	2651.4	12818.4	11534.1	11797.2	16737.1	15132.7	15166.4	3179.5	2791.3	2619.2	13005.6	11664.7
31	PR3	A	20	175.1	84.6	83.6	84	133	132	133	60	72	65	59	58	60	2179.38	510.9	492.9	518.8	4760.1	4476.8	4798.7	5493.9	5199.4	5546	582.4	502.3	485.4	5036.1	4638.8	4840.2	5867.7	5364.7	5561.4	1969.8	2135.6	2085	10678.1	10932.5	10874.8	13185.7	13613	13509.2	1975.8	2074.5	2396.1	10962.4	11635.1
32	BM4	A	20	173.2	76.8	76.8	75.2	126	119	133	67	60	69	56	57	57	2089.5	302.9	318.5	291.5	4241.8	3989.5	4108.7	4750.3	4507.6	4601.9	258.9	447.5	344.8	4268.7	4372.5	4335.4	4748.8	5055.4	4906.8	909.4	1010.6	969.7	11014.7	11475.1	10443.1	12489.3	13078.1	11970.1	946.7	1029.1	1059.9	10795.7	11355
33	JG5	A	25	173.2	77.2	77	74.8	141	136	126	76	86	69	64	54	62	2241.5	383.8	322.1	301.5	3969.1	4060.1	3932.7	4529.3	4569.2	4420.6	381.8	340.4	326.8	4367.1	4496.3	4540.5	4964	5061.3	5095.8	2016.4	1650.1	1388.5	10941.9	11275.7	10662.1	13505.1	13459.5	12582.9	1926	1776.1	1495.8	11157	11390
47	JG6	A	21	178.6	80.6	81	78.6	129	133	132	73	80	76	64	75	64	2156.25	425.8	346.9	363	4574.1	4263.8	4172.2	5220.2	4817.4	4747	412.7	453.9	384.6	3990.3	4432.2	4275.8	4612.4	5111.9	4887.4	1425.4	1283.8	1406.4	10019.1	11589.5	11335	12006.6	13461.1	13371.6	1644.7	1369	1425.9	10818.8	12148.2
53	TC7	A	32	183.3	131	123.4	124.4	139	133	131	89	81	78	72	70	72	2634.63	1258.6	1043.6	1335.4	6248.1	5924.1	6489.2	7839.6	7300.7	8152.2	1189.6	1063.1	1288.5	6453.7	5756	6310.9	7988.7	7206.1	7976	6706.7	6067.8	5778.8	14767.3	14289	15064	22368.2	21183.1	21727.8	6757.2	6704.4	6410.2	15407.7	15102.2
54	TB8	A	24	170.5	74.3	75.2	74.6	105	121	122	75	70	69	67	58	57	2032.63	296.2	291.2	289.1	4224.9	4682.3	4214.9	4731.6	5191.7	4709.4	316.9	255.5	262	4507.3	4317.5	4339.5	5053.7	4789.8	4818.3	1063.4	849.2	945.8	10471.7	10490.2	10353.8	12038.2	11864.7	11823.2	1241.3	1024.5	1095.4	10255.7	10788
55	AB9	A	21	173.2	74.4	72.6	75.4	122	120	117	77	66	65	73	56	65	2060.5	362.1	318.3	248.2	4427.1	4382	4423.5	4980.9	4891.3	4865	321.4	324.4	278.3	4730.3	4765.8	4599.7	5255.1	5293.4	5078.8	1369.4	1139.4	1064.8	10498.5	10523.8	10958.7	12396.9	12189.2	12570.7	1617.9	1443.1	1244.1	11083.7	10691.7
9	JB10	B	22	182	88.4	86.8	86.4	133	124	130	74	61	68	87	63	69	2254	454.2	352.8	461.3	4405.5	3542.1	4239.5	5087.2	4097	4929.5	446.7	402.8	447.8	4780	4434.4	4460.4	5493.7	5090	5159.8	1895.8	1858.9	2011.3	12826.7	12475.3	12126.6	15385	15009.1	14812.8	1808.6	1917.9	1818.6	12531	13207.1
10	KW11	B	22	169.4	64.8	64.4	65	116	107	121	71	60	75	48	52	51	1942	329.7	327.4	287.8	3325.6	3207.1	3069.9	3825.8	3707.4	3517.2	305.7	317.6	275.4	3340.1	3294.5	3256.6	3816	3781.9	3697.1	1393.2	1280.1	1383.5	8889.9	9149.3	8802.6	10753.9	10916.4	10675.5	1317.9	1408.7	1346.4	8946.5	9348.4
12	EM12	B	23	172.6	77	75	76.4	129	135	126	71	81	79	64	68	66	2075	693.2	553.3	590.5	3479.5	3344.9	3461	4410.8	4111.7	4291.9	634.9	468	564.3	3895.3	3768.6	4021.8	4755.6	4449.8	4807.3	2198.9	2004.5	2140.6	9156.9	8806.9	9715.2	11920.4	11357.6	12423.2	2370.8	2079.5	2257.6	9588.9	9479.4
13	RW13	B	22	170.8	78.2	77.2	77.2	112	118	121	59	71	68	71	70	69	2082.5	727.1	620.4	549.1	3652.2	3546.8	3701.6	4576.8	4353.5	4441.9	727.5	628.4	519.2	3794.1	3668.6	4133.1	4759.2	4526.2	4883.5	2691	2439.4	2244.1	9973.5	9975.7	10780.1	13188.2	12968.1	13559	2791	2549.4	2085.9	10061.2	10316.2
15	TD14	B	21	170.2	70.6	71.8	70.8	121	.	110	60	.	53	56	.	54	2006	324.1	305.9	266.2	3395.5	3513.2	3622.6	3875.8	3975.4	4058.7	293.7	264.8	279.1	3716.9	3738.2	3910.5	4202.2	4177.9	4370.6	911	1003.1	956	10181.8	10388.4	10467.7	11601.1	11915.5	11947.5	1237.2	1021.8	1105.4	9896	10292.1
20	BS15	B	21	176.4	81.4	80.4	81	132	125	131	71	70	72	70	76	67	2150.5	393.8	359.7	341	3905.4	3770.2	4028.9	4510	4339.7	4581.2	385.2	417.6	331.3	4225.3	4292.8	4311.3	4843.6	4947.2	4863.2	1306.4	1219.7	1264.7	11857.6	11803.3	11259.9	13827.6	13695.5	13179.3	1407.3	1498.4	1623.8	12650.1	11916.8
21	TT16	B	21	186.4	91.8	92.2	90.6	142	151	150	69	77	68	69	62	75	2317	476.5	369.8	335.7	4473.6	4886.6	4701.7	5188.4	5498.4	5279.9	366.6	326.5	318.8	4738.2	5241.4	4962.1	5378.8	5855	5541.2	1469.3	1406.21	1212.1	13753.5	14093.3	14074.9	15955	16202.3	16006.3	1878.4	1494.3	1446.7	13863.2	14468.5
22	MC17	B	21	183	87.8	90.2	85.6	127	131	134	73	76	65	63	62	61	2416.75	333.9	382.3	429.4	4561.4	4588.6	4292.7	5111.8	5191.2	4942.2	375.3	352.3	442.2	5054.9	4711.6	4819.2	5684.1	5303.9	5513.4	1011.8	1095.7	1139.9	13944.3	14053.5	12561.3	15605.5	15794.3	14311.8	1102.8	1318.7	1379.1	14440.7	14716.6
23	DF18	B	23	164.8	87.2	83.6	82.2	128	130	126	59	63	60	63	66	70	2126	663.2	521.6	526.1	4396.2	4209.4	4306	5263.7	4920.6	5029.7	739.3	606	656.6	4810.9	4622.1	4877.5	5766.8	5446.2	5771.2	2794.2	2242.9	1755.5	11784.5	11072.9	10292.9	15120.3	13877.9	12593.9	2650.7	2468.9	1883.2	11791.8	11482
39	DL19	B	26	179.5	87.8	87.2	89.8	139	139	139	82	81	79	53	51	56	2208.88	376.9	448.8	400.2	4456.8	4790.2	4629.3	5051.2	5464	5252.1	401.2	456.7	407.7	4843.1	4855.1	5140.3	5491.5	5548.2	5805.4	1473.4	1465.9	1350.8	12542.9	12263.1	13231	14658.9	14415.6	15240.5	1557.2	1529.5	1752.6	12789.7	12728.3
49	JG20	B	28	167.5	83.8	78.8	82.4	143	112	143	63	82	74	61	64	48	2083.88	367.4	308.4	309.2	4607.5	4430.8	4122.8	5193.7	4961.9	4639.8	417.8	272.8	351.7	4877.6	4348.2	5270.3	5525.9	4842.5	5875	1186.2	1136.2	1038.7	10913.9	11681	11992.2	12693	13433.7	13665.3	1269.3	1045.4	1240.3	11471.7	11834.3
51	JW21	B	22	174.1	64.8	65.6	67.4	123	122	120	64	68	62	67	62	68	1965.13	244.9	234	232.6	3055.5	3552.3	3720.1	3478.9	3981.9	4141.6	234	247.9	214.4	3403.2	3669.7	3891.5	3825.9	4108.3	4305.8	882.7	758.1	832.8	9104.6	8748.8	8919	10545.2	10012.6	10262.1	1037.9	778.1	840.1	9052.3	8994.8
[truncated: 55 more columns]
